# Supplementary material
Source: publisher figshare collection journal article supplement (https://karger.figshare.com/ndownloader/files/27950745)
Supplement: Supplementary file 1 [file 27950745]

## Sheet: Sheet1
Table S1: Gene Ontology Analysis of differentially expressed gene clusters at PN14, PN21, and PN35
Days		ONTOLOGY	ID	Description	Strength	FDR	Count	Effect
PN14	1	BP	GO:0045104	intermediate filament cytoskeleton organization	1.9	0.00025	4	Up
	2	BP	GO:0009605	response to external stimulus	0.69	0.00054	12	Up
	3	BP	GO:0050896	response to stimulus	0.39	0.00058	20	Up
	4	BP	GO:0051704	multi-organism process	0.67	0.00058	12	Up
	5	BP	GO:0045109	intermediate filament organization	2.03	0.00067	3	Up
	6	BP	GO:0097435	supramolecular fiber organization	1.11	0.00087	6	Up
	7	BP	GO:0051707	response to other organism	0.79	0.0032	8	Up
	8	BP	GO:0009617	response to bacterium	0.94	0.0048	6	Up
	9	BP	GO:0051709	regulation of killing of cells of other organism	2.04	0.0155	2	Up
	10	BP	GO:0042633	hair cycle	1.41	0.017	3	Up
	11	BP	GO:0071310	cellular response to organic substance	0.6	0.017	9	Up
	12	BP	GO:0009987	cellular process	0.2	0.0184	24	Up
	13	BP	GO:0051716	cellular response to stimulus	0.38	0.0184	15	Up
	14	BP	GO:0051412	response to corticosterone	1.89	0.0192	2	Up
	15	BP	GO:0045087	innate immune response	0.88	0.0223	5	Up
	16	BP	GO:0050793	regulation of developmental process	0.52	0.0223	10	Up
	17	BP	GO:0010033	response to organic substance	0.5	0.0261	10	Up
	18	BP	GO:0035458	cellular response to interferon-beta	1.75	0.0287	2	Up
	19	BP	GO:0006955	immune response	0.73	0.0292	6	Up
	20	BP	GO:0007010	cytoskeleton organization	0.73	0.0292	6	Up
	21	BP	GO:0031099	regeneration	1.2	0.035	3	Up
	22	BP	GO:0061844	antimicrobial humoral immune response mediated by antimicrobial peptide	1.66	0.0352	2	Up
	23	BP	GO:0031424	keratinization	1.63	0.0363	2	Up
	24	BP	GO:0071345	cellular response to cytokine stimulus	0.78	0.0393	5	Up
	25	BP	GO:0030198	extracellular matrix organization	1.13	0.0417	3	Up
	26	BP	GO:0051239	regulation of multicellular organismal process	0.46	0.0417	10	Up
	27	BP	GO:0022610	biological adhesion	0.76	0.045	5	Up
	28	BP	GO:0006952	defense response	0.66	0.0465	6	Up
	29	BP	GO:0042221	response to chemical	0.41	0.0488	11	Up
	30	BP	GO:2000026	regulation of multicellular organismal development	0.52	0.0488	8	Up
	31	CC	GO:0005882	intermediate filament	1.43	0.0018	4	Up
	32	CC	GO:0005576	extracellular region	0.56	0.0203	9	Up
	33	CC	GO:0099513	polymeric cytoskeletal fiber	0.85	0.0203	5	Up
PN21	1	CC	GO:0005882	intermediate filament	1.75	5.1e-05	4	Up
	2	CC	GO:0099512	supramolecular fiber	1.02	0.0018	5	Up
	3	CC	GO:0045095	keratin filament	1.9	0.0038	2	Up
	4	CC	GO:0005856	cytoskeleton	0.64	0.0358	5	Up
	5	BP	GO:0045109	intermediate filament organization	2.34	0.00017	3	Up
	6	BP	GO:0031069	hair follicle morphogenesis	2.03	0.0179	2	Up
	7	MF	GO:0005198	structural molecule activity	1.09	0.0155	4	Up
	8	BP	GO:0007601	visual perception	1.52	6.71e-36	34	Down
	9	BP	GO:0007600	sensory perception	0.91	1.32e-18	35	Down
	10	BP	GO:0009583	detection of light stimulus	1.64	1.48e-16	15	Down
	11	BP	GO:0060041	retina development in camera-type eye	1.24	1.18e-15	20	Down
	12	BP	GO:0001895	retina homeostasis	1.58	7.58e-15	14	Down
	13	BP	GO:0046530	photoreceptor cell differentiation	1.49	7.58e-15	15	Down
	14	BP	GO:0045494	photoreceptor cell maintenance	1.65	1.51e-14	13	Down
	15	BP	GO:0050877	nervous system process	0.72	1.65e-14	38	Down
	16	BP	GO:0001654	eye development	0.95	5.61e-14	25	Down
	17	BP	GO:0001754	eye photoreceptor cell differentiation	1.54	1.43e-13	13	Down
	18	BP	GO:0043010	camera-type eye development	0.95	2.84e-12	22	Down
	19	BP	GO:0007423	sensory organ development	0.8	7.95e-12	27	Down
	20	BP	GO:0009584	detection of visible light	1.58	1.06e-10	10	Down
	21	BP	GO:0042461	photoreceptor cell development	1.46	1.06e-10	11	Down
	22	BP	GO:0007602	phototransduction	1.68	2.39e-10	9	Down
	23	BP	GO:0048592	eye morphogenesis	1.09	4.53e-10	15	Down
	24	BP	GO:0009416	response to light stimulus	0.92	1.7e-09	18	Down
	25	BP	GO:0042462	eye photoreceptor cell development	1.53	3.14e-09	9	Down
	26	BP	GO:0051606	detection of stimulus	0.86	1.06e-07	16	Down
	27	BP	GO:0050908	detection of light stimulus involved in visual perception	1.61	2.05e-06	6	Down
	28	BP	GO:0060042	retina morphogenesis in camera-type eye	1.26	2.14e-06	8	Down
	29	BP	GO:0007603	phototransduction, visible light	1.87	2.43e-06	5	Down
	30	BP	GO:0060219	camera-type eye photoreceptor cell differentiation	1.56	2.93e-06	6	Down
	31	BP	GO:0003407	neural retina development	1.19	3.97e-05	7	Down
	32	BP	GO:0009628	response to abiotic stimulus	0.46	0.00029	23	Down
	33	BP	GO:0042592	homeostatic process	0.39	0.00098	27	Down
	34	BP	GO:0016056	rhodopsin mediated signaling pathway	1.83	0.0016	3	Down
	35	BP	GO:0032501	multicellular organismal process	0.18	0.0032	67	Down
	36	BP	GO:0046037	GMP metabolic process	1.43	0.0145	3	Down
	37	BP	GO:0072521	purine-containing compound metabolic process	0.56	0.0145	11	Down
	38	BP	GO:0045872	positive regulation of rhodopsin gene expression	2.13	0.015	2	Down
	39	BP	GO:0009117	nucleotide metabolic process	0.52	0.016	12	Down
	40	BP	GO:0055086	nucleobase-containing small molecule metabolic process	0.49	0.0169	13	Down
	41	BP	GO:0009150	purine ribonucleotide metabolic process	0.58	0.0173	10	Down
	42	BP	GO:0050896	response to stimulus	0.15	0.0173	70	Down
	43	BP	GO:0070428	regulation of nucleotide-binding oligomerization domain containing 1 signaling pathway	1.95	0.0214	2	Down
	44	BP	GO:0034404	nucleobase-containing small molecule biosynthetic process	0.78	0.0232	6	Down
	45	BP	GO:0015672	monovalent inorganic cation transport	0.55	0.0247	10	Down
	46	BP	GO:0009119	ribonucleoside metabolic process	0.87	0.0251	5	Down
	47	BP	GO:0009167	purine ribonucleoside monophosphate metabolic process	0.68	0.0281	7	Down
	48	BP	GO:0050906	detection of stimulus involved in sensory perception	0.67	0.0318	7	Down
	49	BP	GO:0098660	inorganic ion transmembrane transport	0.45	0.0318	13	Down
	50	BP	GO:0030182	neuron differentiation	0.37	0.0348	17	Down
	51	BP	GO:0006811	ion transport	0.34	0.0354	19	Down
	52	BP	GO:0070432	regulation of nucleotide-binding oligomerization domain containing 2 signaling pathway	1.73	0.0354	2	Down
	53	BP	GO:0044782	cilium organization	0.59	0.0396	8	Down
	54	BP	GO:0006164	purine nucleotide biosynthetic process	0.7	0.0436	6	Down
	55	BP	GO:0010659	cardiac muscle cell apoptotic process	1.65	0.0436	2	Down
	56	BP	GO:0007212	dopamine receptor signaling pathway	1.14	0.0475	3	Down
	57	CC	GO:0097730	non-motile cilium	1.42	2.24e-25	26	Down
	58	CC	GO:0097733	photoreceptor cell cilium	1.51	2.24e-25	24	Down
	59	CC	GO:0001750	photoreceptor outer segment	1.58	1.43e-23	21	Down
	60	CC	GO:0001917	photoreceptor inner segment	1.61	4.26e-17	15	Down
	61	CC	GO:0005929	cilium	0.85	1.03e-15	31	Down
	62	CC	GO:0043005	neuron projection	0.53	4.42e-09	36	Down
	63	CC	GO:0042995	cell projection	0.44	4.62e-09	46	Down
	64	CC	GO:0120025	plasma membrane bounded cell projection	0.44	1.85e-08	44	Down
	65	CC	GO:0042622	photoreceptor outer segment membrane	1.87	4.4e-08	6	Down
	66	CC	GO:0035869	ciliary transition zone	1.27	8.96e-08	9	Down
	67	CC	GO:0032391	photoreceptor connecting cilium	1.39	8.08e-07	7	Down
	68	CC	GO:0060170	ciliary membrane	1.2	1.12e-05	7	Down
	69	CC	GO:0005930	axoneme	0.94	0.00041	7	Down
	70	CC	GO:0005886	plasma membrane	0.22	0.0014	53	Down
	71	CC	GO:0005834	heterotrimeric G-protein complex	1.24	0.0019	4	Down
	72	CC	GO:0031253	cell projection membrane	0.63	0.0022	10	Down
	73	CC	GO:0005887	integral component of plasma membrane	0.38	0.0034	20	Down
	74	CC	GO:0005623	cell	0.08	0.005	125	Down
	75	CC	GO:0033165	interphotoreceptor matrix	1.95	0.006	2	Down
	76	CC	GO:0044317	rod spherule	1.95	0.006	2	Down
	77	CC	GO:0032420	stereocilium	1.01	0.0074	4	Down
	78	CC	GO:0019897	extrinsic component of plasma membrane	0.69	0.0148	6	Down
	79	CC	GO:0099568	cytoplasmic region	0.49	0.0163	10	Down
	80	CC	GO:0097542	ciliary tip	1.43	0.0282	2	Down
	81	CC	GO:0016020	membrane	0.11	0.0387	72	Down
	82	CC	GO:0045177	apical part of cell	0.46	0.0387	9	Down
	83	MF	GO:0004114	3',5'-cyclic-nucleotide phosphodiesterase activity	1.37	0.017	4	Down
	84	MF	GO:0005436	sodium:phosphate symporter activity	1.65	0.017	3	Down
	85	MF	GO:0042578	phosphoric ester hydrolase activity	0.66	0.017	11	Down
	86	MF	GO:0047555	3',5'-cyclic-GMP phosphodiesterase activity	1.49	0.019	3	Down
	87	MF	GO:0008081	phosphoric diester hydrolase activity	0.92	0.0322	5	Down
	88	MF	GO:0032561	guanyl ribonucleotide binding	0.57	0.0322	10	Down
	89	MF	GO:0015077	monovalent inorganic cation transmembrane transporter activity	0.57	0.0484	9	Down
PN35	1	MF	GO:0004497	monooxygenase activity	1.7	0.0415	2	Up
	2	MF	GO:0005436	sodium:phosphate symporter activity	1.64	0.0034	4	Down
	3	MF	GO:0030507	spectrin binding	1.23	0.0055	5	Down
	4	MF	GO:0008092	cytoskeletal protein binding	0.38	0.0481	21	Down
	5	BP	GO:0007601	visual perception	1.45	4.17e-38	39	Down
	6	BP	GO:0007600	sensory perception	0.85	2.4e-19	41	Down
	7	BP	GO:0060041	retina development in camera-type eye	1.2	1.18e-18	25	Down
	8	BP	GO:0046530	photoreceptor cell differentiation	1.46	4e-18	19	Down
	9	BP	GO:0009583	detection of light stimulus	1.56	1.43e-17	17	Down
	10	BP	GO:0001654	eye development	0.91	4.59e-16	31	Down
	11	BP	GO:0001895	retina homeostasis	1.51	5.75e-16	16	Down
	12	BP	GO:0045494	photoreceptor cell maintenance	1.58	8.2e-16	15	Down
	13	BP	GO:0042461	photoreceptor cell development	1.47	2.1e-14	15	Down
	14	BP	GO:0050877	nervous system process	0.65	3.01e-14	44	Down
	15	BP	GO:0001754	eye photoreceptor cell differentiation	1.44	3.46e-13	14	Down
	16	BP	GO:0007423	sensory organ development	0.75	4.11e-13	33	Down
	17	BP	GO:0043010	camera-type eye development	0.89	4.24e-13	26	Down
	18	BP	GO:0009584	detection of visible light	1.53	4.01e-12	12	Down
	19	BP	GO:0048592	eye morphogenesis	1.02	4.27e-10	17	Down
	20	BP	GO:0003008	system process	0.49	2.55e-09	45	Down
	21	BP	GO:0042462	eye photoreceptor cell development	1.44	2.66e-09	10	Down
	22	BP	GO:0007602	phototransduction	1.55	3.77e-09	9	Down
	23	BP	GO:0050908	detection of light stimulus involved in visual perception	1.6	2.23e-08	8	Down
	24	BP	GO:0009416	response to light stimulus	0.81	3.72e-08	19	Down
	25	BP	GO:0003407	neural retina development	1.21	1.9e-07	10	Down
	26	BP	GO:0051606	detection of stimulus	0.78	2.28e-07	18	Down
	27	BP	GO:0060249	anatomical structure homeostasis	0.81	2.73e-07	17	Down
	28	BP	GO:0060042	retina morphogenesis in camera-type eye	1.18	1.9e-06	9	Down
	29	BP	GO:0007603	phototransduction, visible light	1.74	1.24e-05	5	Down
	30	BP	GO:0060219	camera-type eye photoreceptor cell differentiation	1.43	1.98e-05	6	Down
	31	BP	GO:0044782	cilium organization	0.7	9.77e-05	14	Down
	32	BP	GO:0030182	neuron differentiation	0.44	0.00017	27	Down
	33	BP	GO:0032501	multicellular organismal process	0.18	0.0007	89	Down
	34	BP	GO:0048666	neuron development	0.43	0.0036	21	Down
	35	BP	GO:0060271	cilium assembly	0.64	0.0038	11	Down
	36	BP	GO:0061512	protein localization to cilium	1.12	0.0038	5	Down
	37	BP	GO:0016056	rhodopsin mediated signaling pathway	1.7	0.0044	3	Down
	38	BP	GO:0008594	photoreceptor cell morphogenesis	1.63	0.0061	3	Down
	39	BP	GO:1903546	protein localization to photoreceptor outer segment	1.57	0.0082	3	Down
	40	BP	GO:0035845	photoreceptor cell outer segment organization	1.47	0.0137	3	Down
	41	BP	GO:0042592	homeostatic process	0.3	0.014	30	Down
	42	BP	GO:0050906	detection of stimulus involved in sensory perception	0.65	0.014	9	Down
	43	BP	GO:0009119	ribonucleoside metabolic process	0.82	0.0196	6	Down
	44	BP	GO:0048513	animal organ development	0.21	0.022	49	Down
	45	BP	GO:0045872	positive regulation of rhodopsin gene expression	2	0.0274	2	Down
	46	BP	GO:0046037	GMP metabolic process	1.3	0.0328	3	Down
	47	BP	GO:0009887	animal organ morphogenesis	0.34	0.0359	21	Down
	48	BP	GO:0009165	nucleotide biosynthetic process	0.57	0.0373	9	Down
	49	BP	GO:0042455	ribonucleoside biosynthetic process	1.01	0.0373	4	Down
	50	BP	GO:0070428	regulation of nucleotide-binding oligomerization domain containing 1 signaling pathway	1.82	0.0382	2	Down
	51	BP	GO:0007399	nervous system development	0.23	0.0471	37	Down
	52	CC	GO:0097730	non-motile cilium	1.39	1.56e-31	33	Down
	53	CC	GO:0097733	photoreceptor cell cilium	1.49	1.56e-31	31	Down
	54	CC	GO:0001750	photoreceptor outer segment	1.55	2.68e-29	27	Down
	55	CC	GO:0005929	cilium	0.88	8.3e-24	45	Down
	56	CC	GO:0001917	photoreceptor inner segment	1.55	2.04e-19	18	Down
	57	CC	GO:0042995	cell projection	0.47	4.08e-14	66	Down
	58	CC	GO:0120025	plasma membrane bounded cell projection	0.45	1.54e-12	62	Down
	59	CC	GO:0043005	neuron projection	0.51	3.09e-11	47	Down
	60	CC	GO:0042622	photoreceptor outer segment membrane	1.8	8.18e-09	7	Down
	61	CC	GO:0060170	ciliary membrane	1.23	4.64e-08	10	Down
	62	CC	GO:0035869	ciliary transition zone	1.18	9.84e-08	10	Down
	63	CC	GO:0032391	photoreceptor connecting cilium	1.32	3.95e-07	8	Down
	64	CC	GO:0005930	axoneme	0.92	5.67e-05	9	Down
	65	CC	GO:0005623	cell	0.09	7.5e-05	173	Down
	66	CC	GO:0033165	interphotoreceptor matrix	2	0.00036	3	Down
	67	CC	GO:0031253	cell projection membrane	0.58	0.002	12	Down
	68	CC	GO:0034464	BBSome	1.63	0.002	3	Down
	69	CC	GO:0099568	cytoplasmic region	0.5	0.0029	14	Down
	70	CC	GO:0005886	plasma membrane	0.18	0.0032	66	Down
	71	CC	GO:0002177	manchette	1.47	0.0036	3	Down
	72	CC	GO:0044317	rod spherule	1.82	0.0123	2	Down
	73	CC	GO:0016020	membrane	0.11	0.0184	97	Down
	74	CC	GO:0005856	cytoskeleton	0.23	0.025	33	Down
	75	CC	GO:0036064	ciliary basal body	0.67	0.025	6	Down
	76	CC	GO:0005887	integral component of plasma membrane	0.29	0.0253	22	Down
	77	CC	GO:0032420	stereocilium	0.88	0.0253	4	Down
	78	CC	GO:0005813	centrosome	0.39	0.0418	12	Down
	79	CC	GO:0005834	heterotrimeric G-protein complex	0.98	0.0447	3	Down
	80	CC	GO:0062023	collagen-containing extracellular matrix	0.6	0.0447	6	Down
BP: biological process; CC: cellular component; MF: molecular function;Strenth,This measure describes how large the enrichment effect is.FDR,false discovery rate;
